# Supplementary material for: Depth-related patterns and regional diversity of free-living nematodes in the deep-sea Southwestern Gulf of Mexico
Source: Frontiers journal article supplement (doi:10.3389/fmars.2022.1023996), 2022-11-22
Supplement: Table_1.XLSX [file Table_1.XLSX]

## Sheet: Sheet1
Site -->	1				2				3				4				5				6			7				8			9		10				11				12				13				14
Species	S1-1	S2-1	S3-1	S4-1	S1-2	S2-2	S3-2	S4-2	S1-3	S2-3	S3-3	S4-3	S1-4	S2-4	S3-4	S4-4	S1-5	S2-5	S3-5	S4-5	S2-6	S3-6	S4-6	S1-7	S2-7	S3-7	S4-7	S2-8	S3-8	S4-8	S3-9	S4-9	S1-10	S2-10	S3-10	S4-10	S1-11	S2-11	S3-11	S4-11	S1-12	S2-12	S3-12	S4-12	S1-13	S2-13	S3-13	S4-13	S1-14
Abelbolla sp.						2	1
Acantholaimus sp. 1				1		2		1														1											1	2		1										2			3
Acantholaimus sp. 2		1			1	2							1								5							1					2	2				1				1				1	1
Acantholaimus sp. 3		1				1							2		1							1						2					1	1		1	1								1
Actinonema sp.																																																	1
Amphimonhystrella sp.						3			1							1											1						1		1		1				1	2
Anguinoides stylosum																													1
Antarcticonema sp.													1			1
Anticoma sp.																													1										1
Astomonema sp.																1
Axonolaimus sp.						1							1			1		1	1																														2
Bathyeurystomina sp.																																	1								1								1
Bodonema sp.																																	2
Calligyrus sp.															1
Calyptronema sp.
Campylaimus sp.														1										1
Cephalanticoma chitwoodi
Cervonema sp. 1						2	1	3					1	1	1	1		2			5	1		3	1	3	1	1	2	1	1	1	1				3								1	3			1
Cervonema sp. 2			1	3	1	2		2								2			1	1	1	3	1	1								1					2		1										1
Cheironchus paravorax
Cheironchus vorax
Choniolaimus sp.
Chromadora sp.							1	1																									1
Chromadorita sp.
Chromaspirina sp.									1
Cobbia aff. trefusiaeformis	3			1											1																																		1
Cobbionema sp.
Daptonema aff. elaboratum						1
Daptonema flagellicauda										1																									1
Daptonema sp.				2														1
Dayellus sp.																							1
Desmodora porosum													1		2																			1
Desmodorella sp.													1
Desmoscolex sp. 1	1					2							3		3	7			4							3					1		2	3			3					1			1		1		2
Desmoscolex sp. 2
Diodontolaimus sp.																																																	1
Diplopeltoides sp. 1	1															2																																1
Diplopeltoides sp. 2							1
Diplopeltoides sp. 3																																										1
Diplopeltula sp. 1														1
Diplopeltula sp. 2
Diplopeltula sp. 3
Dorylaimopsis sp.	1	4	2	3	1	2	1	4	1		3	4		3	3	4			4																														1
Eleutherolaimus sp.	1													1														1
Elzalia kimae	1					1			1
Elzalia poli															1						1
Enchonema sp. 1				1		1		2																					1					1								1				1
Enchonema sp. 2	1	1				1														1	1
Enchonema sp. 3	1						1		1										1																1	1
Endeolophos sp. 1															1	3	1									1		1					1
Endeolophos sp. 2																																		1
Enoploides sp.																			1		1		1										1																1
Greeffiella sp.									1
Greeffiellopsis sp.																																						1
Halalaimus aff. pachyodoroides					1	1	2							1								1		1									1										1			1			2
Halalaimus sp. 1		1																												1												2				1
Halalaimus sp. 2						1	1		1				1															1					1											1					1
Halalaimus sp. 3							1																											1			1
Halalaimus sp. 4	1							1					1	2				1																1													1		1
Halalaimus sp. 5																												1
Halichoanolaimus sp. 1	3																																		1			1
Halichoanolaimus sp. 2				1	1
Halichoanolaimus sp. 3
Halichoanolaimus sp. 4
Halichoanolaimus sp. 5
Haliplectus sp.																					1
Halomonhystera sp.
Hopperia metatypica		1		2						1				2		1
Klugea sp.
Laimella vera	3		2		1								1	3	2	3																																	1
Latronema sp.																																1				1
Ledovitia sp. 1						1																				1							1	3								1					1
Leptosomatum sp.								1																			1
Linhomoeus aff. dolichocaudatus				2		2				2				2		2	1				1														1
Linhystera sp.																										1								1
Litinium sp.						1
Longicyatholaimus sp.														2		1
Manganonema sp.
Marisalbinema aff. galtsovae																																		1						1
Marisalbinema sp. 2																	1
Megadesmolaimus sp.															2				2	1						1								1									1
Mesacanthion sp. 1
Mesacanthion sp. 2																										1
Metachromadoroides sp.
Metacyatholaimus sp.														1	1	2		1	1																														2
Metadasynemella elegans																				1																													1
Metalinhomoeus sp.						1							1				1				2		1
Metasphaerolaimus crassicauda						2	2	1		1					1	2			1								1	1	1	1		1	1						1				1
Metasphaerolaimus sp. 1
Metoncholaimus aff. pelor						1		2							1	1					1		1
Microlaimus sp.						1										2				1
Minolaimus sp.						1
Monhysteridae gen.																																					1
Nemanema sp.
Neonyx sp.																												1
Neotonchus aff.cuanensis														1
Neotonchus pseudocorcundus				1
Oncholaimellus sp.																							1
Oncholaimus sp.																									1	1																				2
Oxystomina sp. 1																					1								1	2	1		3		1
Oxystomina sp. 2
Oxystominidae sp.																1	1																1
Parabostrichus sp.																			1	1
Paradraconema sp.						1	1
Parallelocoilas sp.																		1
Paralongicyatholaimus aff. mastigoides						3							2		2	1																																	2
Paralongicyatholaimus sp.							2																									1				1
Paramarylynnia sp.								2															1								1		1				1												1
Paramesacanthion aff. tricuspis																1	1													1	1															1
Paramphimonhystrella sp. 1																				1
Paramphimonhystrella sp. 2	1							1
Paranticoma sp.					1
Phanoderma sp.																												1																		1
Phanodermella sp.
Phanodermopsis sp.																								2	1												1								1
Pierrickia aff. decasetosa													1								1							1					1		1														2
Platycomopsis sp.										1
Pomponema sp. 1						1								1																																			1
Pomponema sp. 2																				1
Pomponema sp. 3				1
Promonhystera sp.						1							1	2	6	3	1	1	3																										1	1			5
Pselionema sp. 1														1		2			1							1								1															1
Pselionema sp. 2																																														1
Pselionema sp. 3	1														2		1	2	1		1					1				1				1												2	1		1
Pseudodesmodora sp.																2																														2
Rhinema sp.																																1
Richtersia sp.																			1
Sabatieria aff. ancudiana								3	1							1						2		2	4	2	2		1				5	1	1	2	3		3						1	1	1		2
Sabatieria aff. stekhoveni	3		1	1		1	2							4	5	2	3		8			3	2			1		1		1		1		1			3	1	1			1							1
Sabatieria conicauda						1			5		5	5			1	1			1						1		1	6	2	1		1	10	2	1	6	2	1				1		1	1
Sabatieria ornata	6	2		1			1							8		3			6	5			3
Sabatieria sp. 6						1																		1															1		1				1		1
Setosabatieria hilarula	9	1	1			4	1	2					1	2		3	2	4	6	3	1			1	2							4	3	2															3
Siphonolaimus sp.						1
Sphaerolaimus macrocirculus							2			1				3			2		2	1	4									1					1		1										1		1
Sphaerolaimus sp.	1	1							1				2	1	5	3			3		1	1									1
Spirodesma aff. magdae													2			1										1								1					1
Synonchiella sp.															1	1
Syringolaimus sp. 1								1														1											1	1	1											1
Syringolaimus sp. 2																												1										1
Terschellingia longicaudata														1
Thalassironus sp.			1
Theristus sp. 1	1
Theristus sp. 2					1
Tricoma sp. 1		1				1	2		1				3	2		2		1	4						1
Tricoma sp. 2	1												1	2		7			1		1						1		3				1	3					1			1		1					1
Tricoma sp. 3
Trissonchulus sp.
Trochamus sp.																1
Viscosia aff. longissima																																								1
Viscosia glabra														1		2		1							1																								1
Viscosia sp. 3																																		2
Wieseria sp.
Xyalidae gen.																1
Total per site	40	14	8	20	8	50	23	27	15	7	8	9	28	49	43	75	15	16	54	17	29	14	12	12	12	18	8	20	13	10	6	12	44	34	11	13	23	6	10	2	3	12	3	3	8	21	8	1	45
[truncated: 160 more columns]
